# Supplementary material
Source: PubMed Central journal article supplement (PMC470724)

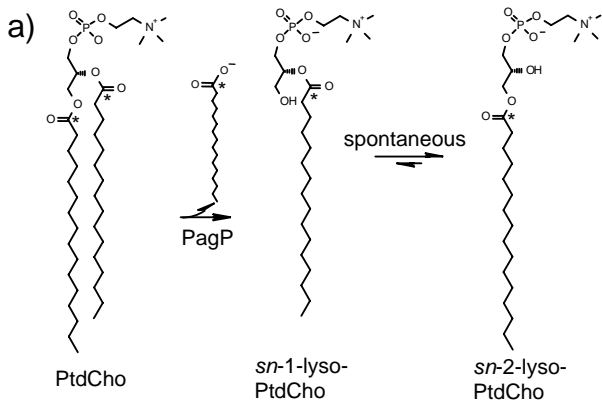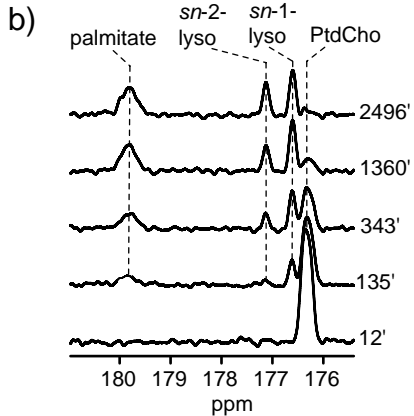

Supplement: pnas_101_26_9618__1.pdf [file pnas_101_26_9618__1.pdf]
